# Supplementary material for: Frozen Ready-to-(h)eat Meals: Evolution of Their Quality during a Real-Time Short Shelf Life
Source: MDPI journal article supplement (doi:10.3390/foods12051087), 2023-03-03
Supplement: s1 [file s1]

# Triangle test (ISO 4120:2021)

Position X – TEST 1

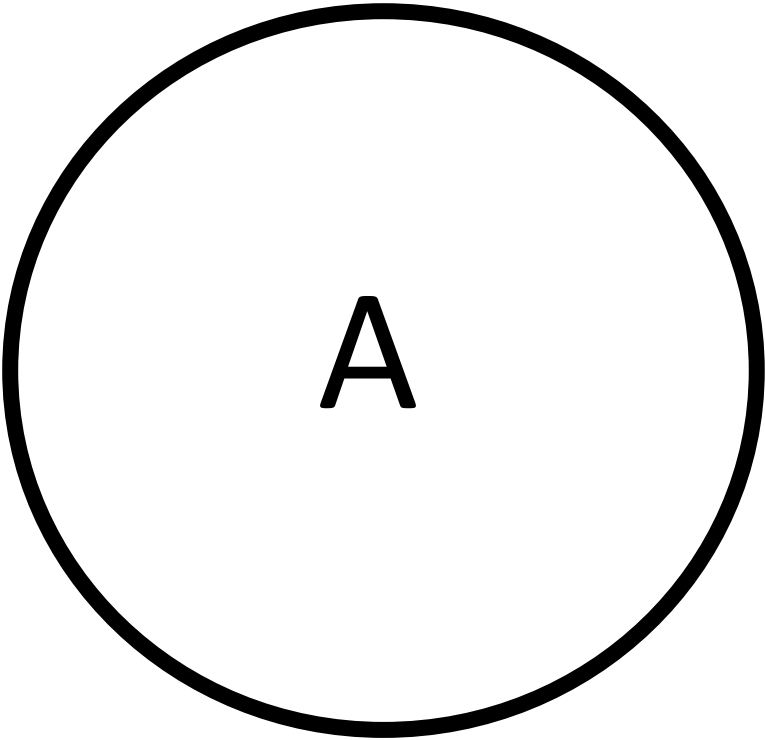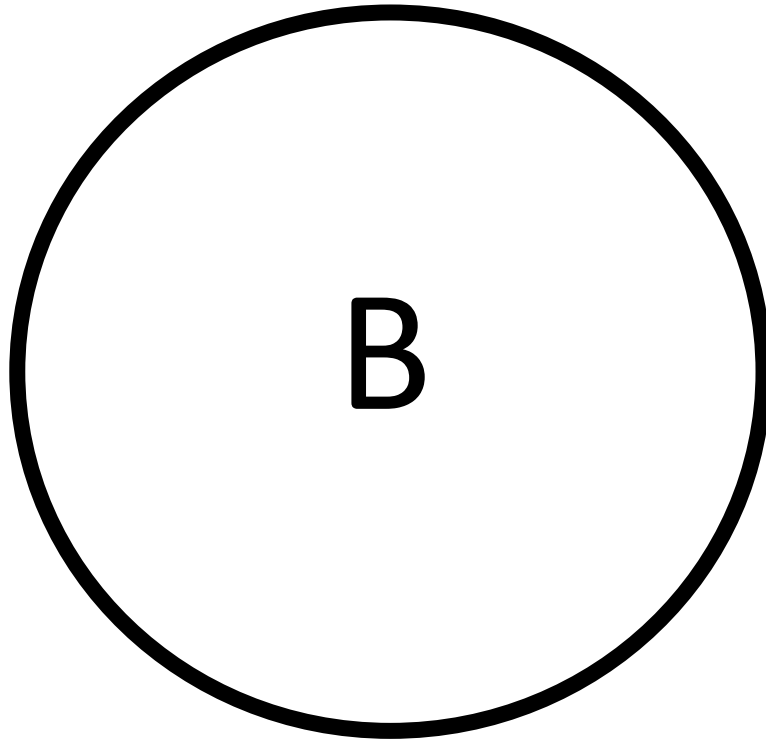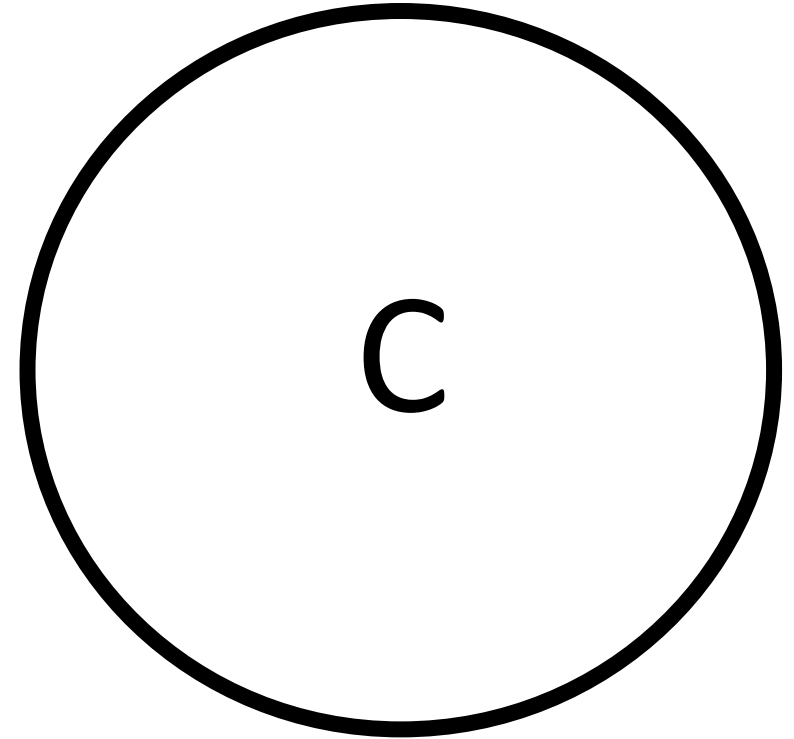

Indicate the different sample \_\_\_\_\_

Date \_\_\_\_\_

Taster \_\_\_\_\_

# Triangle test (ISO 4120:2021)

Position X – TEST 2

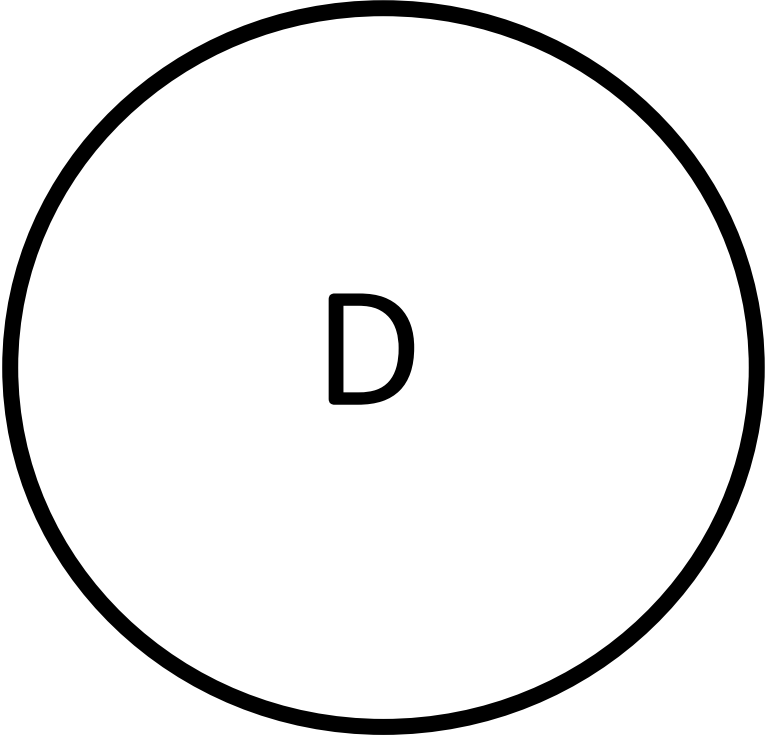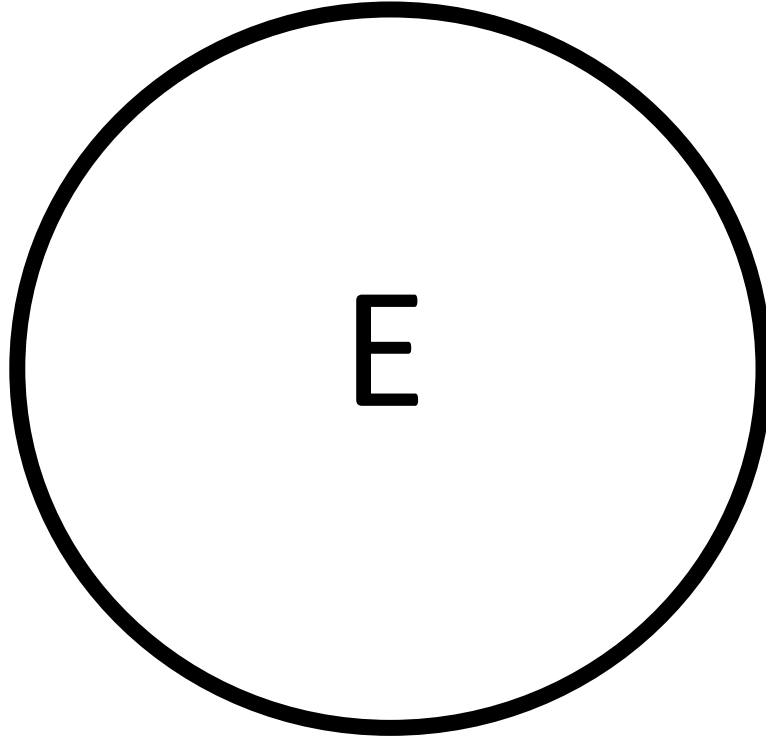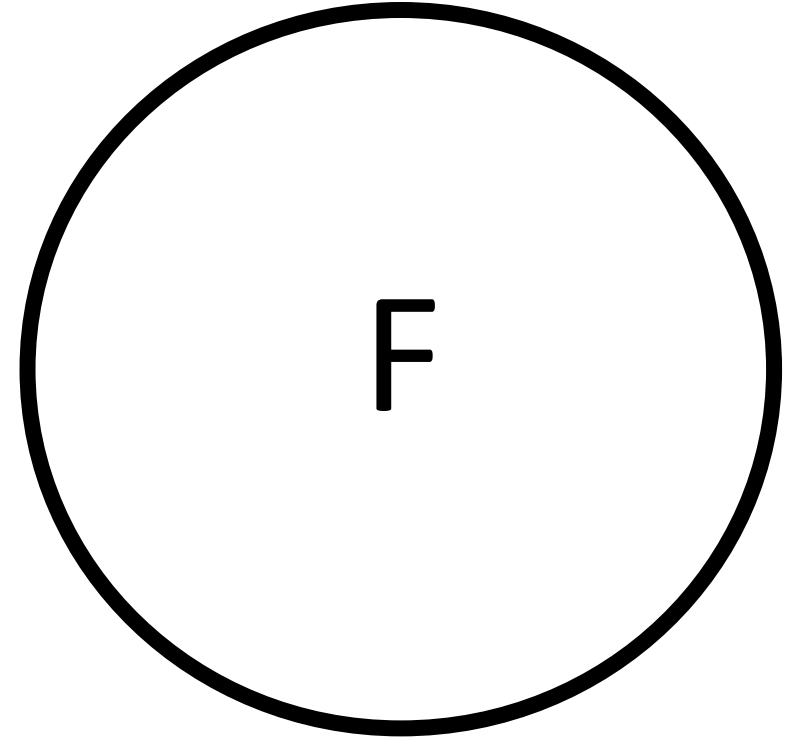

Indicate the different sample \_\_\_\_\_

Date \_\_\_\_\_

Taster \_\_\_\_\_
