# Supplementary material for: Frozen Ready-to-(h)eat Meals: Evolution of Their Quality during a Real-Time Short Shelf Life
Source: MDPI journal article supplement (doi:10.3390/foods12051087), 2023-03-03
Supplement: s1 [file s1]

Ready-to-(h)eat Creamy Soup Sensory Analysis Form

APPEARANCE

|                      |  |
|----------------------|--|
| Orange color         |  |
| Yellow/brown color   |  |
| Homogeneity of color |  |
| Brilliance           |  |
| Surface              |  |
| Greasiness-Oiliness  |  |
| Translucent/watery   |  |
| Presence of mould    |  |
| Palatable            |  |
| Other                |  |

ODOR

|                        |  |
|------------------------|--|
| Overall intensity odor |  |
| Carrot odor            |  |
| Onion odor             |  |
| Tomato odor            |  |
| Potato odor            |  |
| Grain odor             |  |
| Pumpkin odor           |  |
| Fresh vegetable odor   |  |
| Spice odor             |  |
| Oil odor               |  |
| Broth odor             |  |
| Metallic odor          |  |
| Rancid                 |  |
| Fermented              |  |
| Burnt                  |  |
| Paper/cardboard        |  |
| Other                  |  |

TASTE

|        |  |
|--------|--|
| Sweet  |  |
| Salty  |  |
| Sour   |  |
| Bitter |  |
| Umami  |  |

### TEXTURE

|                                     |       |
|-------------------------------------|-------|
| Viscosity                           | <hr/> |
| Graininess                          | <hr/> |
| Clumpiness                          | <hr/> |
| Creaminess                          | <hr/> |
| Chewiness                           | <hr/> |
| Cohesiveness                        | <hr/> |
| Solubility                          | <hr/> |
| Crunchiness                         | <hr/> |
| Adhesiveness                        | <hr/> |
| Consistency                         | <hr/> |
| Softness                            | <hr/> |
| Fat content                         | <hr/> |
| (greasiness - oiliness)             |       |
| Moisture                            | <hr/> |
| (presence of a high liquid content) |       |

### TRIGEMINAL SENSATIONS

|             |       |
|-------------|-------|
| Spiciness   | <hr/> |
| Astringency | <hr/> |
| Burning     | <hr/> |
| Metallic    | <hr/> |

### FINAL SENSATIONS

|             |       |
|-------------|-------|
| Aftertaste  | <hr/> |
| Persistence | <hr/> |

SAMPLE

DATE

TASTER
