# Supplementary material for: Frozen Ready-to-(h)eat Meals: Evolution of Their Quality during a Real-Time Short Shelf Life
Source: MDPI journal article supplement (doi:10.3390/foods12051087), 2023-03-03
Supplement: s1 [file s1]

## Ready-to-(h)eat Tortellini Sensory Analysis Form

### APPEARANCE

|                                |       |
|--------------------------------|-------|
| Color of pasta (Bright yellow) | _____ |
| Homogeneity of color           | _____ |
| Brilliance                     | _____ |
| <i>Surface of the paste</i>    |       |
| Smooth                         | _____ |
| Swollen rough and deformed     | _____ |
| Presence of mould              | _____ |
| Moisture                       | _____ |
| Succulent                      | _____ |
| Overcooked                     | _____ |
| Stringy                        | _____ |
| Meat color light brown         | _____ |
| Meat color dark brown          | _____ |
| Clotted cream                  | _____ |

### ODOR

|                        |       |
|------------------------|-------|
| Overall intensity odor | _____ |
| Pasta odor             | _____ |
| Cooking cream odor     | _____ |
| Meat odor              | _____ |
| Cooked ham odor        | _____ |
| Broth odor             | _____ |
| Vegetable odor         | _____ |
| Spice odor             | _____ |
| Cheese odor            | _____ |
| Oil odor               | _____ |
| Rancid                 | _____ |
| Metallic               | _____ |
| Burnt                  | _____ |
| Paper/cardboard        | _____ |
| Other                  | _____ |

### TASTE

|        |       |
|--------|-------|
| Sweet  | _____ |
| Salty  | _____ |
| Sour   | _____ |
| Bitter | _____ |
| Umami  | _____ |

### TEXTURE

|                                     |  |
|-------------------------------------|--|
| Springiness                         |  |
| Hardness                            |  |
| Firmness                            |  |
| Chewiness                           |  |
| Smoothness/sliminess                |  |
| Roughness                           |  |
| Cohesiveness                        |  |
| Solubility                          |  |
| Adhesiveness                        |  |
| Consistency                         |  |
| Graininess                          |  |
| Gumminess                           |  |
| Fat content (greasiness - oiliness) |  |
| Moisture                            |  |
| (presence of a high liquid content) |  |
| Overcooked                          |  |

### TRIGEMINAL SENSATIONS

|             |  |
|-------------|--|
| Spiciness   |  |
| Astringency |  |
| Burning     |  |
| Metallic    |  |

### FINAL SENSATIONS

|             |  |
|-------------|--|
| Aftertaste  |  |
| Persistence |  |

SAMPLE

DATE

TASTER
